# Supplementary material for: Role of vertebral corner inflammation and fat deposition on MRI on syndesmophyte development detected on whole spine low-dose CT scan in radiographic axial spondyloarthritis
Source: PubMed Central journal article supplement (PMC9272129; doi:10.1136/rmdopen-2022-002250), 2022-07-08
Supplement: rmdopen-2022-002250supp001.pdf [file rmdopen-2022-002250supp001.pdf]

## Supplementary tables

**Supplementary table 1:** Detailed definitions of patterns of MRI lesions.

| <b>Regarding VCI only</b>                                                                           | <b>baseline</b>        | <b>1-year</b>        | <b>2-years</b>        |
|-----------------------------------------------------------------------------------------------------|------------------------|----------------------|-----------------------|
| 1--VCI at any timepoint, irrespective of VCFD status                                                | <b>VCI+</b>            | VCI+/-               | VCI+/-                |
|                                                                                                     | VCI+/-                 | <b>VCI+</b>          | VCI+/-                |
|                                                                                                     | VCI+/-                 | VCI+/-               | <b>VCI+</b>           |
| 2--VCI at baseline, irrespective of VCI status at other timepoints and irrespective of VCFD status  | <b>VCI+</b>            | VCI+/-               | VCI+/-                |
| 3--VCI at baseline only, irrespective of VCFD status                                                | <b>VCI+</b>            | <b>VCI-</b>          | <b>VCI-</b>           |
| 4--VCI at baseline and another timepoint, irrespective of VCFD status                               | <b>VCI+</b>            | <b>VCI+</b>          | VCI+/-                |
|                                                                                                     | <b>VCI+</b>            | VCI+/-               | <b>VCI+</b>           |
| 5--VCI at all three timepoints, irrespective of VCFD status                                         | <b>VCI+</b>            | <b>VCI+</b>          | <b>VCI+</b>           |
| 6--VCI at $\geq 2$ consecutive timepoints, irrespective of VCFD status                              | <b>VCI+</b>            | <b>VCI+</b>          | VCI+/-                |
|                                                                                                     | VCI+/-                 | <b>VCI+</b>          | <b>VCI+</b>           |
| <b>Regarding VCFD only</b>                                                                          | <b>T0<br/>baseline</b> | <b>T1<br/>1-year</b> | <b>T2<br/>2-years</b> |
| 7--VCFD at any timepoint, irrespective of VCI status                                                | <b>VCFD+</b>           | VCFD+/-              | VCFD+/-               |
|                                                                                                     | VCFD+/-                | <b>VCFD+</b>         | VCFD+/-               |
|                                                                                                     | VCFD+/-                | VCFD+/-              | <b>VCFD+</b>          |
| 8--VCFD at baseline, irrespective of VCFD status at other timepoints and irrespective of VCI status | <b>VCFD+</b>           | VCFD+/-              | VCFD+/-               |
| 9--VCFD at baseline only, irrespective of VCI status                                                | <b>VCFD+</b>           | <b>VCFD-</b>         | <b>VCFD-</b>          |
| 10--VCFD at baseline and another timepoint, irrespective of VCI status                              | <b>VCFD+</b>           | <b>VCFD+</b>         | VCFD+/-               |
|                                                                                                     | <b>VCFD+</b>           | VCFD+/-              | <b>VCFD+</b>          |
| 11--VCFD at all three timepoints, irrespective of VCI status                                        | <b>VCFD+</b>           | <b>VCFD+</b>         | <b>VCFD+</b>          |
| <b>Regarding VCI and VCFD</b>                                                                       | <b>T0<br/>baseline</b> | <b>T1<br/>1-year</b> | <b>T2<br/>2-years</b> |
| 12--Vertebral corner inflammation (VCI) but not vertebral corner fat (VCFD) at any timepoint        | <b>VCI+</b>            | VCI+/-               | VCI+/-                |
|                                                                                                     | <b>VCFD-</b>           | <b>VCFD-</b>         | <b>VCFD-</b>          |
|                                                                                                     | VCI+/-                 | <b>VCI+</b>          | VCI+/-                |
|                                                                                                     | <b>VCFD-</b>           | <b>VCFD-</b>         | <b>VCFD-</b>          |
| 13--VCFD but not VCI at any timepoint                                                               | VCI+/-                 | VCI+/-               | <b>VCI+</b>           |
|                                                                                                     | <b>VCFD-</b>           | <b>VCFD-</b>         | <b>VCFD-</b>          |
|                                                                                                     | <b>VCFD+</b>           | VCFD+/-              | VCFD+/-               |
|                                                                                                     | <b>VCI-</b>            | <b>VCI-</b>          | <b>VCI-</b>           |
| 14--VCI preceded VCFD                                                                               | VCFD+/-                | <b>VCFD+</b>         | VCFD+/-               |
|                                                                                                     | <b>VCFD+</b>           | <b>VCFD-</b>         | <b>VCFD-</b>          |
|                                                                                                     | <b>VCI+</b>            | <b>VCI-</b>          | <b>VCI-</b>           |
|                                                                                                     | <b>VCFD-</b>           | VCFD+/-              | <b>VCFD+</b>          |
| 15--VCI preceded or coincides with VCFD. VCFD does not precede VCI                                  | VCI+/-                 | <b>VCI+</b>          | <b>VCI-</b>           |
|                                                                                                     | <b>VCFD-</b>           | <b>VCFD-</b>         | <b>VCFD+</b>          |
|                                                                                                     | <b>VCI+</b>            | <b>VCI-</b>          | <b>VCI-</b>           |
|                                                                                                     | VCFD+/-                | VCFD+/-              | VCFD+/-               |
|                                                                                                     | <b>VCI+</b>            | VCI+/-               | <b>VCI-</b>           |
|                                                                                                     | VCFD+/-                | <b>VCFD+</b>         | VCFD+/-               |

|                                                                                     |                               |                             |                             |
|-------------------------------------------------------------------------------------|-------------------------------|-----------------------------|-----------------------------|
|                                                                                     | <b>VCI+</b><br><b>VCFD+/-</b> | VCI+/-<br>VCFD+/-           | VCI+/-<br><b>VCFD+</b>      |
|                                                                                     | VCI+/-<br><b>VCFD-</b>        | <b>VCI+</b><br><b>VCFD+</b> | <b>VCI-</b><br>VCFD+/-      |
|                                                                                     | VCI+/-<br><b>VCFD-</b>        | <b>VCI+</b><br>VCFD+/-      | VCI+/-<br><b>VCFD+</b>      |
|                                                                                     | VCI+/-<br><b>VCFD-</b>        | VCI+/-<br><b>VCFD-</b>      | <b>VCI+</b><br><b>VCFD+</b> |
| 16--Sequential or simultaneous presence of VCI and VCFD across the three timepoints | <b>VCI+</b><br><b>VCFD+</b>   | VCI+/-<br>VCFD+/-           | VCI+/-<br>VCFD+/-           |
|                                                                                     | VCI+/-<br>VCFD+/-             | <b>VCI+</b><br><b>VCFD+</b> | VCI+/-<br>VCFD+/-           |
|                                                                                     | VCI+/-<br>VCFD+/-             | VCI+/-<br>VCFD+/-           | <b>VCI+</b><br><b>VCFD+</b> |
|                                                                                     | <b>VCI+</b><br>VCFD+/-        | VCI+/-<br><b>VCFD+</b>      | VCI-<br>VCFD+/-             |
|                                                                                     | <b>VCI+</b><br>VCFD+/-        | VCI+/-<br>VCFD+/-           | VCI+/-<br><b>VCFD+</b>      |
|                                                                                     | VCI+/-<br><b>VCFD+</b>        | VCI+/-<br>VCFD+/-           | <b>VCI+</b><br>VCFD+/-      |
|                                                                                     | VCI+/-<br>VCFD+/-             | VCI+/-<br><b>VCFD+</b>      | <b>VCI+</b><br>VCFD+/-      |
| 17—Coexistence of VCI and VCFD at the same timepoint                                | <b>VCI+</b><br><b>VCFD+</b>   | <b>VCI-</b><br><b>VCFD-</b> | <b>VCI-</b><br><b>VCFD-</b> |
|                                                                                     | <b>VCI-</b><br><b>VCFD-</b>   | <b>VCI+</b><br><b>VCFD+</b> | <b>VCI-</b><br><b>VCFD-</b> |
|                                                                                     | <b>VCI-</b><br><b>VCFD-</b>   | <b>VCI-</b><br><b>VCFD-</b> | <b>VCI+</b><br><b>VCFD+</b> |
|                                                                                     | <b>VCI-</b><br><b>VCFD-</b>   | <b>VCI+</b><br><b>VCFD+</b> | <b>VCI+</b><br><b>VCFD+</b> |
|                                                                                     | <b>VCI+</b><br><b>VCFD+</b>   | <b>VCI+</b><br><b>VCFD+</b> | <b>VCI+</b><br><b>VCFD+</b> |
|                                                                                     | <b>VCI+</b><br><b>VCFD+</b>   | <b>VCI+</b><br><b>VCFD+</b> | <b>VCI-</b><br><b>VCFD-</b> |
|                                                                                     | <b>VCI+</b><br><b>VCFD+</b>   | <b>VCI-</b><br><b>VCFD-</b> | <b>VCI+</b><br><b>VCFD+</b> |
| 18—Absence of VCI and VCFD                                                          | <b>VCI-</b><br><b>VCFD-</b>   | <b>VCI-</b><br><b>VCFD-</b> | <b>VCI-</b><br><b>VCFD-</b> |

The table presents definitions of patterns of MRI lesions over time on the vertebral corner level. The variables indicating presence of a pattern are coded as true (1) or false (0). MRI lesions are vertebral corner inflammation (VCI) and vertebral corner fat deposition (VCFD) and can be present (+), absent (-) or allowed to be either present or absent (+/-). The pattern variable is true for an MRI reader if the pattern of MRI lesions on a vertebral corner scored by that reader matches with at least one row of possible MRI patterns. When a pattern is scored by  $\geq 2$  MRI readers the pattern is deemed present and coded as true (1).

**Supplementary table 2:** baseline demographics

|                                                              | <b>N=50</b> |
|--------------------------------------------------------------|-------------|
| Age at inclusion (mean (SD))                                 | 49 (9.8)    |
| Sex (males)                                                  | 43 (86%)    |
| Uveitis                                                      | 14 (28%)    |
| Psoriasis                                                    | 3 (6%)      |
| IBD                                                          | 3 (6%)      |
| Heel enthesitis                                              | 7 (14%)     |
| Dactylitis                                                   | 3 (6%)      |
| Peripheral arthritis                                         | 7 (14%)     |
| HLA-B27 status                                               | 39 (78%)    |
| Elevated CRP or ESR                                          | 27 (54%)    |
| Number of syndesmophytes on radiographs reader 1 (mean (SD)) | 5.7 (4.5)   |
| Number of syndesmophytes on radiographs reader 2 (mean (SD)) | 6.2 (5.1)   |
| BASDAI (mean (SD))                                           | 3.8 (2.2)   |
| ASDAS-CRP (mean (SD))                                        | 2.6 (1.2)   |
| Physician global (mean (SD))                                 | 4.1 (2.1)   |
| NSAID use current                                            | 33 (66%)    |
| csDMARD use ever                                             | 12 (24%)    |
| csDMARD use current                                          | 5 (10%)     |
| bDMARD use ever                                              | 14 (28%)    |
| bDMARD use current                                           | 11 (22%)    |

SpA features (uveitis, psoriasis, inflammatory bowel disease (IBD), heel enthesitis, dactylitis, peripheral arthritis, HLA-B27 and elevated CRP or ESR) are presented as ever/never. Numbers are presented as N (%) unless otherwise specified. SD, standard deviation; IBD, inflammatory bowel disease; CRP, C-reactive protein; ESR, erythrocyte sedimentation rate; BASDAI, Bath Ankylosing Spondylitis Disease Activity Index; ASDAS-CRP, Ankylosing Spondylitis Disease Activity Score; NSAID, non-steroidal anti-inflammatory drug; csDMARD, conventional synthetic Disease Modifying Anti Rheumatic Drug; bDMARD, biological Disease Modifying Anti Rheumatic Drug.
